# Supplementary material for: Lacticaseibacillus rhamnosus P118 enhances host tolerance to Salmonella infection by promoting microbe-derived indole metabolites
Source: eLife. 2025 Aug 7;13:RP101198. doi: 10.7554/eLife.101198 (PMC12331243; doi:10.7554/eLife.101198)
Supplement: Supplementary file 1. [file elife-101198-supp1.xlsx]

## Sheet: Supplementary File 1
	Supplementary File 1 Milk-clotting activity of the isolated strains
	Strain ID	Strain name	milk-clotting (h)	pH value	Acidity (°T)
	P2	Lacticaseibacillus paracasei	23	4.34 ± 0.05	79 ± 2
	P12	Lacticaseibacillus paracasei	12	4.36 ± 0.06	85 ± 1
	P29	Lactobacillus acidophilus	13	3.85 ± 0.02	89 ± 1
	P30	Lacticaseibacillus paracasei	12	4.33 ± 0.05	90 ± 2
	P33	Streptococcus salivarius ssp. thermophilus	18	4.25 ± 0.02	83 ± 2
	P35	Streptococcus salivarius ssp. thermophilus	14	4.10 ± 0.05	75 ± 3
	P39	Lactobacillus delbrueckii	11	4.22 ± 0.03	73 ± 1
	P44	Lacticaseibacillus paracasei	22	4.35 ± 0.06	83 ± 3
	P52	Streptococcus salivarius ssp. thermophilus	13	4.17 ± 0.03	75 ± 2
	P59	Lacticaseibacillus paracasei	15	4.21 ± 0.02	82 ± 2
	P63	Streptococcus salivarius ssp. thermophilus	19	4.56 ± 0.02	75 ± 1
	P70	Lactobacillus acidophilus	10	3.80 ± 0.06	93 ± 2
	P74	Lactobacillus zeae	22	4.08 ± 0.02	86 ± 3
	P82	Lacticaseibacillus paracasei	17	4.22 ± 0.03	84 ± 2
	P90	Lacticaseibacillus paracasei	14	4.19 ± 0.04	81 ± 1
	P107	Lactobacillus acidophilus	12	4.39 ± 0.02	85 ± 3
	P118	Lacticaseibacillus rhamnosus	12	4.15 ± 0.07	89 ± 2
	P120	Lacticaseibacillus rhamnosus	13	4.33 ± 0.02	85 ± 2
	P133	Lactobacillus johnsonii	10	4.34 ± 0.03	80 ± 1
	P139	Lactobacillus johnsonii	15	4.21 ± 0.04	81 ± 3
	P150	Lactobacillus amylovorus	23	4.11 ± 0.03	86 ± 2
	P156	Lactobacillus amylovorus	23	4.36 ± 0.02	88 ± 2
	P171	Lactobacillus reuteri	18	4.30 ± 0.02	79 ± 3
	P191	Lactobacillus mucosae	15	4.27 ± 0.05	79 ± 3
	P199	Lactobacillus paracasei	22	4.19 ± 0.04	88 ± 1
	P206	Lactobacillus mucosae	16	4.56 ± 0.03	80 ± 2
	P211	Lactobacillus mucosae	14	4.69 ± 0.02	76 ± 2
	194 other strains		＞ 24	＞ 4.71	＜ 73
