# Supplementary material for: Lacticaseibacillus rhamnosus P118 enhances host tolerance to Salmonella infection by promoting microbe-derived indole metabolites
Source: eLife. 2025 Aug 7;13:RP101198. doi: 10.7554/eLife.101198 (PMC12331243; doi:10.7554/eLife.101198)
Supplement: Supplementary file 2. [file elife-101198-supp2.xlsx]

## Sheet: Supplementary File 2
	Supplementary File 2 Significance between life span data was calculated using a Mantel-Cox log-rank test
		Chi Square	df	P value
	Overall	569.2	12	< 0.0001
	STm vs OP50	105.5	1	< 0.0001
	P118 vs STm	209.8	1	< 0.0001
	P119 vs STm	193.8	1	< 0.0001
	P120 vs STm	206.7	1	< 0.0001
	P121 vs STm	9.745	1	0.0018
	P122 vs STm	1.708	1	0.1913
	P123 vs STm	9.058	1	0.0026
	P124 vs STm	17.18	1	< 0.0001
	P125 vs STm	2.568	1	0.1091
	P126 vs STm	0.3922	1	0.5312
	P131 vs STm	8.302	1	0.004
	P132 vs STm	25.55	1	< 0.0001
