# Supplementary material for: Lacticaseibacillus rhamnosus P118 enhances host tolerance to Salmonella infection by promoting microbe-derived indole metabolites
Source: eLife. 2025 Aug 7;13:RP101198. doi: 10.7554/eLife.101198 (PMC12331243; doi:10.7554/eLife.101198)
Supplement: Supplementary file 3. [file elife-101198-supp3.xlsx]

## Sheet: Supplementary File 3
	Supplementary File 3 Significance between life span data was calculated using a Mantel-Cox log-rank test
		Chi Square	df	P value
	Overall	508.5	5	< 0.0001
	STm vs OP50	131.5	1	< 0.0001
	Fermented cultures vs STm	158.5	1	< 0.0001
	Supernant vs STm	175.7	1	< 0.0001
	P118 lysate vs STm	144.2	1	< 0.0001
	Boiled P118 vs STm	137.4	1	< 0.0001
	Fermented cultures vs Supernant	1.084	1	0.2997
	Fermented cultures vs P118 lysate	13.57	1	0.0002
	Fermented cultures vs Boiled P118	29.65	1	< 0.0001
	Supernant vs P118 lysate	16.47	1	< 0.0001
	Supernant vs Boiled P118	29.6	1	< 0.0001
