# Supplementary material for: Lacticaseibacillus rhamnosus P118 enhances host tolerance to Salmonella infection by promoting microbe-derived indole metabolites
Source: eLife. 2025 Aug 7;13:RP101198. doi: 10.7554/eLife.101198 (PMC12331243; doi:10.7554/eLife.101198)
Supplement: Supplementary file 4. — The draft genome of P118 was queried using the NCBI non-redundant prokaryotic database available through MIGA (http://microbial-genomes.org/). p-Values reflect confidence in the assignment as each taxonomic rank. [file elife-101198-supp4.xlsx]

## Sheet: Supplementary File 4
	Supplementary File 4 Species level identity of Lacticaseibacillus rhamnosus P118. Draft genome of Lacticaseibacillus rhamnosus P118 was queried using the NCBI non-redundant prokaryotic database available through MIGA (http://www.microbial-genomes.org). p-values reflect confidence in assignment as each taxonomic rank.
	The closest relatives found by MiGA in the database were Lacticaseibacillus rhamnosus NZ LR134322 (100.0% ANI) and Lacticaseibacillus rhamnosus NZ CP046267 (100.0% ANI).
	Rank	Taxonomy	P-value	Signif.
	----	--------	-------	-------
	root	?	0	****
	domain	Bacteria	0	****
	phylum	Firmicutes	0	****
	class	Bacilli	0	****
	order	Lactobacillales	0	****
	family	Lactobacillaceae	0	****
	genus	Lacticaseibacillus	8.02e-05	****
	species	Lacticaseibacillus rhamnosus	8.02e-05	****
	subspecies	?	0.646
	Significance at p-value below: *0.5, **0.1, ***0.05, ****0.01
