# Supplementary material for: Lacticaseibacillus rhamnosus P118 enhances host tolerance to Salmonella infection by promoting microbe-derived indole metabolites
Source: eLife. 2025 Aug 7;13:RP101198. doi: 10.7554/eLife.101198 (PMC12331243; doi:10.7554/eLife.101198)
Supplement: Supplementary file 5. — Average nucleotide identity (ANI) and average amino acid identity (AAI) using both percent identity and a fraction of genome shared as determined through MIGA (http://microbial-genomes.org/) query of the NCBI non-redundant prokaryotic genomes database were considered for ranking likelihood of nearest subspecies phylogenetic neighbors for duplicate isolates of each Lacticaseibacillus species. [file elife-101198-supp5.xlsx]

## Sheet: Supplementary File 5
	Supplementary File 5 Lacticaseibacillus rhamnosus P118 draft genome nearest subspecies phylogenetic neighbors. Average nucleotide identity (ANI) and average amino acid identity (AAI) using both percent identity and fraction of genome shared as determined through MIGA (http://www.microbial-genomes.org) query of the NCBI non-redundant prokaryotic genomes database were considered to rank likelihood …
	average nucleotide identity (ANI)				average amino acid identity (AAI)
	Dataset	ANI (%)	Standard deviation (ANI%)	Fraction of genome shared (%)	Dataset	AAI (%)	Standard deviation (AAI%)	Fraction of proteins shared (%)
	Lacticaseibacillus rhamnosus NZ LR134322	100	0	100	Lacticaseibacillus rhamnosus NZ LR134322	100	0	(estimated)
	Lacticaseibacillus rhamnosus NZ CP046267	100	0	99.7	Lacticaseibacillus rhamnosus NZ CP046267	100	0	(estimated)
	Lacticaseibacillus rhamnosus NZ CP019305	99.99	0	99.8	Lacticaseibacillus rhamnosus NZ CP019305	100	0	(estimated)
	Lacticaseibacillus rhamnosus NZ CP022109	99.99	0	99.8	Lacticaseibacillus rhamnosus NZ CP022109	100	0	(estimated)
	Lacticaseibacillus rhamnosus NZ LR134331T	99.99	0	99.9	Lacticaseibacillus rhamnosus NZ LR134331T	99.98	0	(estimated)
	Lacticaseibacillus rhamnosus NZ CP014645	99.96	0	96.59	Lacticaseibacillus rhamnosus NZ CP014645	100	0	(estimated)
	Lacticaseibacillus rhamnosus NZ LT220504	99.04	0	96.49	Lacticaseibacillus rhamnosus NZ LT220504	99.38	0	(estimated)
	Lacticaseibacillus rhamnosus NZ CP067365	99.03	0	96.39	Lacticaseibacillus rhamnosus NZ CP067365	99.48	0	(estimated)
	Lacticaseibacillus rhamnosus NZ CP044228	97.72	0	88.47	Lacticaseibacillus rhamnosus NZ CP044228	98.7	0	(estimated)
	Lacticaseibacillus rhamnosus NZ CP040780	97.64	0	89.07	Lacticaseibacillus rhamnosus NZ CP040780	99.19	0	(estimated)
	Lacticaseibacillus rhamnosus NZ CP017063	97.62	0	89.57	Lacticaseibacillus rhamnosus NZ CP017063	99.15	0	(estimated)
	Lactobacillus rhamnosus LOCK900 NC 021723	97.51	0	91.47	Lactobacillus rhamnosus LOCK900 NC 021723	98.77	0	(estimated)
	Lactobacillus rhamnosus DSM 14870 NZ CP006804	97.43	0	87.36	Lactobacillus rhamnosus DSM 14870 NZ CP006804	98.9	0	(estimated)
	Lacticaseibacillus rhamnosus NZ CP045531	97.39	0	88.06	Lacticaseibacillus rhamnosus NZ CP045531	98.73	0	(estimated)
	Lactobacillus rhamnosus GG NC 017482	97.34	0	85.76	Lactobacillus rhamnosus GG NC 017482	98.9	0	(estimated)
	Lacticaseibacillus rhamnosus NZ CP014201	97.33	0	87.36	Lacticaseibacillus rhamnosus NZ CP014201	99.03	0	(estimated)
	Lactobacillus casei DSM 20011 JCM 1134 ATCC 393 NZ AP012544T	81.47	0	49.85	Lactobacillus casei DSM 20011 JCM 1134 ATCC 393 NZ AP012544T	85.77	0	(estimated)
	Lacticaseibacillus zeae NZ LS991421	81.42	0	53.26	Lacticaseibacillus zeae NZ LS991421	86.07	0	(estimated)
	Lacticaseibacillus paracasei NZ CP041944	80.1	0	43.33	Lacticaseibacillus paracasei NZ CP041944	81.05	0	(estimated)
					Lacticaseibacillus manihotivorans NZ CP045068	61.47	0	(estimated)
					Latilactobacillus sakei NZ CP025839	55.28	0	(estimated)
					Schleiferilactobacillus harbinensis NZ CP041364	54.3	0	(estimated)
					Loigolactobacillus bifermentans NZ CP045872	53.64	0	(estimated)
					Bombilactobacillus bombi NZ CP031513	52.58	0	(estimated)
					Lactobacillus farciminis KCTC 3681 DSM 20184 NZ CP017702T	52.31	0	(estimated)
					Lactiplantibacillus pentosus NZ CP032654	52.25	0	(estimated)
					Liquorilactobacillus hordei NZ CP018176	51.9	0	(estimated)
					Ligilactobacillus animalis NZ CP047141	51.87	0	(estimated)
					Levilactobacillus brevis CP032931	51.75	0	(estimated)
					Pediococcus damnosus NZ CP012294	51.58	0	(estimated)
					Furfurilactobacillus rossiae NZ CP040576	51.3	0	(estimated)
					Pediococcus pentosaceus NZ CP028264	51.25	0	(estimated)
					Lactobacillus buchneri NRRL B 30929 NC 015428	50.86	0	(estimated)
					Lactobacillus jensenii NZ CP018809	50.75	0	(estimated)
					Lactobacillus oligofermentans DSM 15707 LMG 22743 NZ LN898144	50.75	0	(estimated)
					Lactobacillus amylovorus GRL1118 NC 017470	50.62	0	(estimated)
					Apilactobacillus kunkeei NZ CP012920	50.43	0	(estimated)
					Lactobacillus gasseri ATCC 33323 JCM 1131 NC 008530T	50.41	0	(estimated)
					Lactobacillus kullabergensis NZ CP029477	50.33	0	(estimated)
					Limosilactobacillus vaginalis NZ CP045240	50.21	0	(estimated)
					Limosilactobacillus fermentum NZ CP040910T	49.85	0	(estimated)
					Weissella confusa NZ CP027565	49.81	0	(estimated)
					Carnobacterium inhibens subsp. gilichinskyi NC 022606T	49.48	0	(estimated)
					Weissella paramesenteroides NZ CP023501	49.36	0	(estimated)
					Weissella sp. HDW19 NZ CP049888	48.95	0	(estimated)
					Fructilactobacillus lindneri NZ CP014872	48.59	0	(estimated)
					Leuconostoc lactis NZ CP042420	48.41	0	(estimated)
					Leuconostoc mesenteroides NZ CP035746	48.34	0	(estimated)
					Leuconostoc gelidum JB7 NC 018631	48.01	0	(estimated)
					Streptococcus oralis NZ CP066021T	47.86	0	(estimated)
