# Supplementary material for: Lacticaseibacillus rhamnosus P118 enhances host tolerance to Salmonella infection by promoting microbe-derived indole metabolites
Source: eLife. 2025 Aug 7;13:RP101198. doi: 10.7554/eLife.101198 (PMC12331243; doi:10.7554/eLife.101198)
Supplement: Supplementary file 6. [file elife-101198-supp6.xlsx]

## Sheet: Supplementary File 6
	Supplementary File 6 Primers for quantitative PCR
	Gene name	Primers	Accesion ID
	Claudin-1	F: AAAGCACCGGGCAGATACAG	NM_016674
		R: GGGGGTCAAGGGGTCATAGA
	ZO-1	F: GCCGCTAAGAGCACAGCAA	NM_001417374
		R: TCCCCACTCTGAAAATGAGGA
	IL-1β	F: ACAGGCTCCGAGATGAACAAC	NM_008361
		R: GTGGGTGTGCCGTCTTTCAT
	IL-6	F: TAGTCCTTCCTACCCCAATTTCC	NM_031168
		R: TTGGTCCTTAGCCACTCCTTC
	IL-18	F: GAAGAAGCCATAGACACCAAGAG	NM_008365
		R: AGGCGAGAACAAGCACAGT
	TNF-α	F: CCTCACACTCACAAACCACCA	NM_001278601
		R: ACAAGGTACAACCCATCGGC
	iNOS	F: CTCACCTACTTCCTGGACATTAC	NM_001313922
		R: CAATCTCTGCCTATCCGTCTC
	GAPDH	F: CAAAATGGTGAAGGTCGGTGTG	NM_001411843
		R: TGATGTTAGTGGGGTCTCGCTC
