# Supplementary material for: Lacticaseibacillus rhamnosus P118 enhances host tolerance to Salmonella infection by promoting microbe-derived indole metabolites
Source: eLife. 2025 Aug 7;13:RP101198. doi: 10.7554/eLife.101198 (PMC12331243; doi:10.7554/eLife.101198)
Supplement: Supplementary file 7. [file elife-101198-supp7.xlsx]

## Sheet: Supplementary File 7
	Supplementary File 7 The criteria of clinical symptom scores
	Score	Overall observation	Diarrhoea degree	histopathological observation
	0	None	None	None
	1	Slightly distended	Slight abdominal distension (semi-solid state)	Mild (less than 5% of mucosal surface area with inflammation)
	2	Hair loss	Moderate abdominal distension (semi-liquid state)	Moderate (5-10% of mucosal surface area with inflammation)
	3	Unstable standing	Diarrhea (liquid stool)	Severe (11-30% of mucosal surface area with inflammation)
	4	Difficulty breathing	Severe abdominal distension (bloody stool)	Very severe (more than 30% of mucosal surface area with inflammation)
