# Supplementary material for: Lacticaseibacillus rhamnosus P118 enhances host tolerance to Salmonella infection by promoting microbe-derived indole metabolites
Source: eLife. 2025 Aug 7;13:RP101198. doi: 10.7554/eLife.101198 (PMC12331243; doi:10.7554/eLife.101198)
Supplement: Supplementary file 8. [file elife-101198-supp8.xlsx]

## Sheet: Supplementary File 8
	Supplementary File 8 ANOSIM, PERMANOVA and MRPP analysis of microbial diversity among treatments
		ANOSIM		PERMANOVA		MRPP
		R	P	R2	P	A	P
	Treatment	0.820254	0.001	0.829071	0.001	0.563514	0.001
	C vs S	1	0.001	0.850402	0.005	0.596761	0.005
	C vs P	1	0.004	0.786028	0.009	0.542685	0.006
	S vs P+S	0.392	0.016	0.290236	0.036	0.129632	0.036
