# Supplementary material for: Lacticaseibacillus rhamnosus P118 enhances host tolerance to Salmonella infection by promoting microbe-derived indole metabolites
Source: eLife. 2025 Aug 7;13:RP101198. doi: 10.7554/eLife.101198 (PMC12331243; doi:10.7554/eLife.101198)
Supplement: Supplementary file 9. [file elife-101198-supp9.xlsx]

## Sheet: Supplementary File 9
	Supplementary File 9 ANOSIM, PERMANOVA and MRPP analysis of fecal metabolites among treatments
		ANOSIM		PERMANOVA		MRPP
		R	P	R2	P	A	P
	Treatment	0.804439	0.001	0.680968	0.001	0.456843	0.001
	C vs S	0.833705	0.001	0.65749	0.001	0.444958	0.001
	S vs P+S	0.445871	0.001	0.209948	0.004	0.117279	0.001
