# Supplementary material for: Lacticaseibacillus rhamnosus P118 enhances host tolerance to Salmonella infection by promoting microbe-derived indole metabolites
Source: eLife. 2025 Aug 7;13:RP101198. doi: 10.7554/eLife.101198 (PMC12331243; doi:10.7554/eLife.101198)
Supplement: Supplementary file 10. [file elife-101198-supp10.xlsx]

## Sheet: Supplementary File 10
	Supplementary File 10 Significant differential fecal metabolites in “S vs C” and “P+S vs S”
	S vs C Differential metabolites								P+S vs S Differential metabolites
	ID	Metabolite Name	Log2(Fold change)	Log10 (P value)	VIP	Fold change	P value	Up.Down	ID	Metabolite Name	Log2(Fold change)	Log10 (P value)	VIP	Fold change	P value	Up.Down
	Com_5220_pos	Ala-trp	-3.20282	7.18188	1.26463	0.108606	6.57838e-08	down	Com_5220_pos	Ala-trp	2.91402	6.31214	2.31794	7.53716	4.87366e-07	up
	Com_294_pos	L-Alanyl-L-proline	-5.6448	6.51065	1.44161	0.0199869	3.0857e-07	down	Com_294_pos	L-Alanyl-L-proline	2.88044	4.93463	1.48283	7.36372	1.16245e-05	up
	Com_2095_pos	4',7-Dihydroxyflavanone	-4.62047	8.09484	1.39807	0.0406538	8.03815e-09	down	Com_2095_pos	4',7-Dihydroxyflavanone	2.76662	3.39923	1.4455	6.80509	0.000398813	up
	Com_1680_neg	Thiamine	-3.74361	5.21781	1.33187	0.0746554	6.0561e-06	down	Com_1680_neg	Thiamine	2.68597	4.03346	1.77727	6.43514	9.25859e-05	up
	Com_1380_neg	Protocatechuic acid	-5.12538	7.95974	1.45471	0.0286488	1.09714e-08	down	Com_1380_neg	Protocatechuic acid	2.4655	3.40385	1.1108	5.52318	0.00039459	up
	Com_221_neg	β-D-Fructose 6-phosphate	-2.61447	3.90337	1.18259	0.163293	0.000124919	down	Com_221_neg	β-D-Fructose 6-phosphate	2.29609	2.18801	1.50385	4.91125	0.00648623	up
	Com_3521_neg	Tyrosol	-1.69608	5.97226	1.10639	0.308623	1.06595e-06	down	Com_3521_neg	Tyrosol	2.19755	6.50552	2.54579	4.587	3.12234e-07	up
	Com_1018_pos	2-Benzyl-5-[(3S)-1-isopropyl-3-pyrrolidinyl]-1,3,4-oxadiazole	-5.52006	6.27672	1.43824	0.021792	5.28784e-07	down	Com_1018_pos	2-Benzyl-5-[(3S)-1-isopropyl-3-pyrrolidinyl]-1,3,4-oxadiazole	2.19266	3.95095	1.18339	4.57148	0.000111957	up
	Com_277_pos	Pyridoxine	-4.49746	8.30419	1.45872	0.0442721	4.96377e-09	down	Com_277_pos	Pyridoxine	2.12574	6.25623	1.35109	4.36428	5.54327e-07	up
	Com_544_pos	(S)-Equol	-3.24351	6.46379	1.44456	0.105586	3.43722e-07	down	Com_544_pos	(S)-Equol	1.90398	4.98776	1.69325	3.74245	1.02859e-05	up
	Com_2977_pos	N-Acetylvaline	-3.39698	7.86635	1.45536	0.0949305	1.36034e-08	down	Com_2977_pos	N-Acetylvaline	1.89579	6.34204	1.5575	3.72125	4.54943e-07	up
	Com_974_pos	Glycitein	-2.60003	3.3896	1.2044	0.164935	0.000407758	down	Com_974_pos	Glycitein	1.89076	2.50403	1.64052	3.70831	0.0031331	up
	Com_39_neg	α,α-Trehalose	-4.37453	4.46548	1.38001	0.0482098	3.42391e-05	down	Com_39_neg	α,α-Trehalose	1.88484	2.36707	1.11427	3.69312	0.00429469	up
	Com_1078_neg	Aleuritic acid	-3.24244	12.4122	1.46438	0.105664	3.87036e-13	down	Com_1078_neg	Aleuritic acid	1.84038	4.1088	1.39261	3.58105	7.78387e-05	up
	Com_4374_pos	3,5,7-trihydroxy-2-phenyl-4H-chromen-4-one	-1.65807	4.17309	1.13676	0.316862	6.71293e-05	down	Com_4374_pos	3,5,7-trihydroxy-2-phenyl-4H-chromen-4-one	1.78089	4.76922	2.2851	3.43638	1.70129e-05	up
	Com_188_neg	3-(4-Hydroxyphenyl)propionic acid	-2.80981	3.652	1.28547	0.142615	0.000222842	down	Com_188_neg	3-(4-Hydroxyphenyl)propionic acid	1.76167	2.73806	1.54366	3.3909	0.00182784	up
	Com_617_pos	Daidzein	-1.85382	3.56387	1.14033	0.276658	0.00027298	down	Com_617_pos	Daidzein	1.73437	3.34692	2.00002	3.32734	0.000449862	up
	Com_5304_pos	DL-α-Aminocaprylic acid	-2.19747	5.99179	1.35975	0.218019	1.01907e-06	down	Com_5304_pos	DL-α-Aminocaprylic acid	1.73321	5.23074	2.1069	3.32466	5.87836e-06	up
	Com_935_pos	N-Methylisoleucine	-1.85313	4.0187	1.24495	0.276791	9.57845e-05	down	Com_935_pos	N-Methylisoleucine	1.72295	3.92686	2.23342	3.3011	0.000118344	up
	Com_265_pos	Valylproline	-3.76421	4.83199	1.39216	0.0735971	1.47234e-05	down	Com_265_pos	Valylproline	1.66572	2.91603	1.29338	3.17272	0.00121331	up
	Com_266_pos	Metanephrine	-3.75033	4.85613	1.39362	0.0743084	1.39275e-05	down	Com_266_pos	Metanephrine	1.64365	2.91262	1.28356	3.12455	0.00122287	up
	Com_2497_pos	6-Hydroxynicotinic acid	-1.97954	6.77022	1.33462	0.253571	1.69737e-07	down	Com_2497_pos	6-Hydroxynicotinic acid	1.62513	6.31233	2.10705	3.08471	4.87162e-07	up
	Com_6132_pos	N-Acetyl-L-tyrosine	-2.20978	4.63019	1.34381	0.216168	2.34318e-05	down	Com_6132_pos	N-Acetyl-L-tyrosine	1.56941	3.82952	1.91223	2.96784	0.000148073	up
	Com_5235_pos	Phosphocholine	-2.43593	9.99478	1.43686	0.184805	1.0121e-10	down	Com_5235_pos	Phosphocholine	1.5652	7.67356	1.8162	2.95918	2.12049e-08	up
	Com_7404_pos	Lysope 18:1	-1.89116	5.27505	1.19273	0.269589	5.30825e-06	down	Com_7404_pos	Lysope 18:1	1.56519	4.30123	1.92377	2.95917	4.99771e-05	up
	Com_18207_neg	1-Methylguanosine	-2.52667	6.51815	1.42607	0.173538	3.03284e-07	down	Com_18207_neg	1-Methylguanosine	1.55547	4.20276	1.48513	2.93929	6.26957e-05	up
	Com_954_pos	20-Hydroxy prostaglandin F2α	-2.5271	3.97997	1.21324	0.173487	0.000104719	down	Com_954_pos	20-Hydroxy prostaglandin F2α	1.54808	2.0208	1.34453	2.92427	0.00953226	up
	Com_5895_pos	4-(benzoylamino)-3-hydroxybutanoic acid	-2.35716	5.75126	1.4143	0.195175	1.77314e-06	down	Com_5895_pos	4-(benzoylamino)-3-hydroxybutanoic acid	1.47457	4.68256	1.75786	2.779	2.07702e-05	up
	Com_290_pos	tert-Butyl N-[1-(aminocarbonyl)-3-methylbutyl]carbamate	-2.80084	6.96903	1.35664	0.143504	1.0739e-07	down	Com_290_pos	tert-Butyl N-[1-(aminocarbonyl)-3-methylbutyl]carbamate	1.46521	3.15328	1.32346	2.76103	0.000702625	up
	Com_7344_pos	6-(4-methoxybenzyl)-3-methyl-5,6,7,8-tetrahydroquinoline	-1.62771	2.79036	1.14019	0.323601	0.00162046	down	Com_7344_pos	6-(4-methoxybenzyl)-3-methyl-5,6,7,8-tetrahydroquinoline	1.46491	2.58974	1.95799	2.76046	0.00257192	up
	Com_14493_pos	6β-Naltrexol	-2.17193	7.99195	1.3687	0.221914	1.01871e-08	down	Com_14493_pos	6β-Naltrexol	1.44986	5.63529	1.79109	2.73181	2.31586e-06	up
	Com_197_pos	D-(+)-Maltose	-2.59351	3.86245	1.29822	0.165682	0.000137263	down	Com_197_pos	D-(+)-Maltose	1.44511	2.55727	1.51735	2.72283	0.00277158	up
	Com_1521_neg	Cnidioside A	-1.69241	4.11477	1.27352	0.309409	7.67763e-05	down	Com_1521_neg	Cnidioside A	1.43358	3.7506	1.9365	2.70116	0.000177582	up
	Com_3958_pos	Naringenin	-2.85412	4.19546	1.25195	0.138301	6.37588e-05	down	Com_3958_pos	Naringenin	1.41524	1.64586	1.0822	2.66705	0.0226016	up
	Com_4289_pos	Isohomovanillic acid	-1.82247	5.89868	1.23165	0.282736	1.26277e-06	down	Com_4289_pos	Isohomovanillic acid	1.37373	2.57442	1.62844	2.59139	0.00266429	up
	Com_3393_neg	Equol	-2.81159	9.43906	1.48921	0.142439	3.63863e-10	down	Com_3393_neg	Equol	1.35831	6.08515	1.27255	2.56384	8.21953e-07	up
	Com_1190_neg	Citramalic acid	-1.99127	6.23598	1.40946	0.251518	5.80793e-07	down	Com_1190_neg	Citramalic acid	1.33984	4.70465	1.71667	2.53123	1.97401e-05	up
	Com_8146_neg	Gibberellin A4	-1.97195	8.1329	1.40226	0.254908	7.36382e-09	down	Com_8146_neg	Gibberellin A4	1.31357	3.90265	1.58392	2.48555	0.000125125	up
	Com_1273_pos	α-Linolenoyl ethanolamide	-3.66639	5.07895	1.39907	0.0787604	8.33775e-06	down	Com_1273_pos	α-Linolenoyl ethanolamide	1.3064	2.59869	1.06951	2.47324	0.0025195	up
	Com_3426_pos	α-Aspartylphenylalanine	-2.35637	3.72539	1.30897	0.195282	0.000188196	down	Com_3426_pos	α-Aspartylphenylalanine	1.28242	2.38137	1.51479	2.43247	0.00415557	up
	Com_3978_pos	Androsterone	-2.58164	6.01348	1.43361	0.167051	9.69432e-07	down	Com_3978_pos	Androsterone	1.27178	4.14241	1.41756	2.4146	7.20428e-05	up
	Com_2725_pos	2-Hydroxybutyric acid	-3.1239	4.71842	1.35977	0.114713	1.91239e-05	down	Com_2725_pos	2-Hydroxybutyric acid	1.21064	2.33741	1.1126	2.3144	0.00459823	up
	Com_3016_pos	p-Hydroxybenzaldehyde	-2.19855	7.39497	1.45645	0.217857	4.02741e-08	down	Com_3016_pos	p-Hydroxybenzaldehyde	1.20849	5.65537	1.586	2.31096	2.21122e-06	up
	Com_1254_neg	Liquiritigenin	-2.05923	3.13159	1.29282	0.239944	0.000738593	down	Com_1254_neg	Liquiritigenin	1.18143	2.0167	1.40391	2.26801	0.00962287	up
	Com_110_pos	Linoleoyl ethanolamide	-2.55749	4.48831	1.36725	0.169871	3.24853e-05	down	Com_110_pos	Linoleoyl ethanolamide	1.15039	2.59585	1.27502	2.21974	0.00253602	up
	Com_1813_pos	TNH	-2.12047	4.25972	1.21918	0.229972	5.49892e-05	down	Com_1813_pos	TNH	1.10441	1.61418	1.1566	2.15011	0.0243121	up
	Com_5020_pos	trans-Cinnamaldehyde	-1.67614	9.84823	1.44304	0.312918	1.41829e-10	down	Com_5020_pos	trans-Cinnamaldehyde	1.07542	7.60019	1.82287	2.10734	2.51076e-08	up
	Com_28156_neg	alpha-Ketoglutaric acid	-1.01195	4.93623	1.13531	0.495875	1.15816e-05	down	Com_28156_neg	alpha-Ketoglutaric acid	1.07442	6.72518	2.1924	2.10587	1.88287e-07	up
	Com_707_neg	Tetradecanedioic acid	-2.25614	3.83256	1.35898	0.209331	0.000147042	down	Com_707_neg	Tetradecanedioic acid	1.06847	2.19933	1.2686	2.09721	0.00631933	up
	Com_7126_neg	O-Acetyl-L-homoserine	-2.54276	6.41392	1.44525	0.171615	3.85548e-07	down	Com_7126_neg	O-Acetyl-L-homoserine	1.04375	3.5095	1.03231	2.06158	0.000309383	up
	Com_7084_pos	P-Aminohippuric Acid	-1.97562	8.69354	1.4377	0.254261	2.02518e-09	down	Com_7084_pos	P-Aminohippuric Acid	1.0278	5.1605	1.43939	2.03891	6.91039e-06	up
	Com_4818_pos	Ureidosuccinic acid	-1.60115	4.23245	1.12537	0.329615	5.8553e-05	down	Com_4818_pos	Ureidosuccinic acid	1.0274	1.59926	1.27949	2.03835	0.0251614	up
	Com_8496_pos	Pleuromutilin	-1.6895	4.24666	1.23063	0.310033	5.66677e-05	down	Com_8496_pos	Pleuromutilin	1.02304	2.75923	1.53088	2.03219	0.00174087	up
	Com_14489_pos	1-(2,4-dihydroxyphenyl)-2-(3,5-dimethoxyphenyl)propan-1-one	-2.16419	5.6562	1.36222	0.223107	2.20699e-06	down	Com_14489_pos	1-(2,4-dihydroxyphenyl)-2-(3,5-dimethoxyphenyl)propan-1-one	1.01474	3.03602	1.20472	2.02054	0.000920404	up
	Com_8431_neg	Syringic acid	-1.03444	2.93098	1.07607	0.488206	0.00117226	down	Com_8431_neg	Syringic acid	1.01006	2.81162	1.80642	2.014	0.00154304	up
	Com_13194_pos	lipoamide	-1.31269	6.38162	1.34284	0.402569	4.15316e-07	down	Com_13194_pos	lipoamide	1.00987	5.28533	2.02749	2.01373	5.18405e-06	up
	Com_14099_pos	Licochalcone A	-2.37908	6.80789	1.39235	0.192232	1.55636e-07	down	Com_14099_pos	Licochalcone A	0.998567	3.22769	1.13222	1.99801	0.000591982	up
	Com_3638_pos	Apocynin	-1.5723	5.16121	1.36486	0.336272	6.89909e-06	down	Com_3638_pos	Apocynin	0.988439	3.69847	1.72225	1.98404	0.000200232	up
	Com_955_pos	(12Z)-9,10,11-trihydroxyoctadec-12-enoic acid	-1.82667	3.91518	1.25104	0.281914	0.000121569	down	Com_955_pos	(12Z)-9,10,11-trihydroxyoctadec-12-enoic acid	0.986809	2.1452	1.33713	1.9818	0.00715808	up
	Com_9422_neg	Estradiol	-2.25121	4.63	1.37663	0.210048	2.34422e-05	down	Com_9422_neg	Estradiol	0.970943	2.37153	1.09482	1.96012	0.00425075	up
	Com_11441_neg	Taurocholic acid	-1.83163	3.77033	1.22046	0.280947	0.000169693	down	Com_11441_neg	Taurocholic acid	0.965934	2.99133	1.27822	1.95333	0.00102016	up
	Com_19324_neg	Lactobionic acid	-2.036	11.3746	1.4928	0.243839	4.22104e-12	down	Com_19324_neg	Lactobionic acid	0.957682	6.57186	1.24437	1.94219	2.68005e-07	up
	Com_10374_pos	YLH	-2.42567	7.25745	1.41455	0.186123	5.52772e-08	down	Com_10374_pos	YLH	0.944936	3.38721	1.13406	1.9251	0.000410008	up
	Com_2302_pos	2-(2-oxo-2-{[2-(2-oxo-1-imidazolidinyl)ethyl]amino}ethoxy)acetic acid	-1.51623	3.1291	1.23371	0.349597	0.000742852	down	Com_2302_pos	2-(2-oxo-2-{[2-(2-oxo-1-imidazolidinyl)ethyl]amino}ethoxy)acetic acid	0.936761	2.12035	1.55739	1.91423	0.00757972	up
	Com_7872_pos	1-Methylguanine	-0.872494	3.7894	1.06349	0.546202	0.000162406	down	Com_7872_pos	1-Methylguanine	0.924146	3.8016	2.14094	1.89756	0.000157907	up
	Com_527_pos	Isoferulic acid	-2.30452	5.151	1.30344	0.202428	7.06311e-06	down	Com_527_pos	Isoferulic acid	0.910745	1.97907	1.02761	1.88002	0.0104937	up
	Com_8816_neg	2-(2-carboxy-2-methylpropyl)-4,6-dimethylbenzoic acid	-0.859045	3.08068	1.00486	0.551318	0.000830471	down	Com_8816_neg	2-(2-carboxy-2-methylpropyl)-4,6-dimethylbenzoic acid	0.909248	3.43441	1.94115	1.87807	0.000367785	up
	Com_8896_neg	Ursolic acid	-1.52087	5.64302	1.2934	0.348476	2.27501e-06	down	Com_8896_neg	Ursolic acid	0.908128	2.56373	1.31578	1.87661	0.0027307	up
	Com_29336_neg	6-phospho-D-glucono-1,5-lactone	-1.6201	5.87292	1.27724	0.325313	1.33992e-06	down	Com_29336_neg	6-phospho-D-glucono-1,5-lactone	0.90676	2.09046	1.15614	1.87483	0.0081197	up
	Com_4223_pos	Paracetamol	-1.47571	4.56576	1.23091	0.359557	2.71791e-05	down	Com_4223_pos	Paracetamol	0.904156	2.23662	1.38856	1.87145	0.00579942	up
	Com_32448_neg	Lactitol	-1.29191	5.19832	1.28836	0.40841	6.33401e-06	down	Com_32448_neg	Lactitol	0.864392	3.95732	1.5727	1.82057	0.000110326	up
	Com_814_pos	octadec-9-ynoic acid	-1.48248	6.2736	1.36636	0.357872	5.32601e-07	down	Com_814_pos	octadec-9-ynoic acid	0.85937	3.48947	1.49306	1.81425	0.00032399	up
	Com_5278_pos	3-Acetoxyurs-12-en-23-oic acid	-1.49681	3.24397	1.20794	0.354337	0.000570203	down	Com_5278_pos	3-Acetoxyurs-12-en-23-oic acid	0.836927	1.84226	1.33308	1.78624	0.0143793	up
	Com_9280_pos	4-[1-(dimethylamino)ethylidene]-2-phenyl-1,3-oxazol-5(4H)-one	-2.20032	4.85881	1.35243	0.217589	1.38416e-05	down	Com_9280_pos	4-[1-(dimethylamino)ethylidene]-2-phenyl-1,3-oxazol-5(4H)-one	0.827719	2.1891	1.03774	1.77488	0.0064699	up
	Com_631_neg	Ethylmalonic acid	-1.69264	5.5321	1.34773	0.309361	2.93697e-06	down	Com_631_neg	Ethylmalonic acid	0.81018	2.31304	1.10406	1.75343	0.00486363	up
	Com_10829_pos	5-Methoxyindole-3-Carbaldehyde	-0.586745	1.88163	0.849799	0.665843	0.0131331	down	Com_10829_pos	5-Methoxyindole-3-Carbaldehyde	0.796083	4.03616	2.16071	1.73638	9.20103e-05	up
	Com_10595_pos	Malvidin	-1.3533	5.79794	1.30488	0.391396	1.59242e-06	down	Com_10595_pos	Malvidin	0.774488	3.75557	1.50258	1.71058	0.000175562	up
	Com_3509_neg	4-(hydroxymethyl)benzoic acid	-1.34754	4.68299	1.30807	0.392962	2.07496e-05	down	Com_3509_neg	4-(hydroxymethyl)benzoic acid	0.772968	2.61147	1.31909	1.70878	0.00244643	up
	Com_4831_neg	L-Argininosuccinate	-1.12443	4.3282	1.28033	0.458684	4.6968e-05	down	Com_4831_neg	L-Argininosuccinate	0.749163	2.79185	1.4722	1.68082	0.00161492	up
	Com_12971_pos	L-(+)-Citrulline	-1.4727	5.50084	1.30209	0.360307	3.15619e-06	down	Com_12971_pos	L-(+)-Citrulline	0.743587	2.19274	1.21907	1.67433	0.00641591	up
	Com_7350_neg	4-Hydroxybenzylcyanide	-1.14147	4.41574	1.36258	0.453298	3.8394e-05	down	Com_7350_neg	4-Hydroxybenzylcyanide	0.742148	3.17873	1.61716	1.67266	0.000662625	up
	Com_6045_pos	5-Hydroxytryptophan	-1.16393	6.49568	1.389	0.446295	3.19392e-07	down	Com_6045_pos	5-Hydroxytryptophan	0.728872	4.92037	1.69462	1.65734	1.20125e-05	up
	Com_16013_pos	Edaravone	-0.84422	4.88285	1.22137	0.557012	1.30963e-05	down	Com_16013_pos	Edaravone	0.677163	4.51505	1.97652	1.59899	3.05454e-05	up
	Com_12362_pos	2-{2-[(1-methyl-1H-pyrazol-5-yl)amino]-2-oxoethoxy}acetic acid	-1.15586	3.81233	1.16078	0.448799	0.000154052	down	Com_12362_pos	2-{2-[(1-methyl-1H-pyrazol-5-yl)amino]-2-oxoethoxy}acetic acid	0.668329	1.71174	1.25429	1.58923	0.0194206	up
	Com_2388_pos	4-Pyridoxic acid	-1.27107	4.9507	1.35787	0.414352	1.12022e-05	down	Com_2388_pos	4-Pyridoxic acid	0.664666	2.90299	1.43491	1.5852	0.00125028	up
	Com_2498_pos	Indole	-0.817379	3.4272	1.20803	0.567472	0.000373941	down	Com_2498_pos	Indole	0.629654	2.74895	1.80118	1.54719	0.0017826	up
	Com_807_pos	10-Undecenoic acid	-1.23693	3.48263	1.29129	0.424274	0.000329132	down	Com_807_pos	10-Undecenoic acid	0.612526	1.9595	1.33145	1.52893	0.0109774	up
	Com_2945_pos	(11E,15Z)-9,10,13-trihydroxyoctadeca-11,15-dienoic acid	-1.19579	4.3666	1.25511	0.436547	4.29935e-05	down	Com_2945_pos	(11E,15Z)-9,10,13-trihydroxyoctadeca-11,15-dienoic acid	0.598234	2.41239	1.32108	1.51386	0.00386914	up
	Com_68_pos	Indole-3-acrylic acid	-1.19684	4.26154	1.32712	0.43623	5.47597e-05	down	Com_68_pos	Indole-3-acrylic acid	0.388382	1.55236	0.928138	1.30893	0.0280308	up
	Com_70_pos	DL-Tryptophan	-1.19316	4.26803	1.32635	0.437344	5.39473e-05	down	Com_70_pos	DL-Tryptophan	0.387552	1.54679	0.928689	1.30817	0.0229571	up
	Com_751_neg	Picolinic acid	-1.09345	5.16602	1.40783	0.468641	6.82308e-06	down	Com_751_neg	Picolinic acid	0.354386	2.71231	0.8482	1.27844	0.00193952	up
	Com_389_neg	N-Acetylaspartic acid	0.82036	2.61741	1.02958	1.76585	0.00241315	up	Com_389_neg	N-Acetylaspartic acid	-0.611304	1.78088	1.45947	0.654605	0.0165622	down
	Com_3717_pos	ACar 18:1	1.12686	5.79015	1.25178	2.18382	1.62126e-06	up	Com_3717_pos	ACar 18:1	-0.640378	2.80111	1.44266	0.641545	0.00158084	down
	Com_130_neg	Palmitoleic Acid	1.19072	4.64647	1.30953	2.28266	2.257e-05	up	Com_130_neg	Palmitoleic Acid	-0.687451	2.64161	1.33658	0.62095	0.00228237	down
	Com_7142_pos	Oleandrin	1.00657	2.8681	1.06104	2.00913	0.00135487	up	Com_7142_pos	Oleandrin	-0.750977	2.03306	1.56778	0.594201	0.00926704	down
	Com_10610_pos	Ecgonine methyl ester	1.75681	3.60959	1.27734	3.37949	0.000245705	up	Com_10610_pos	Ecgonine methyl ester	-0.8018	1.44648	1.00169	0.573633	0.0357698	down
	Com_4041_pos	N6-Methyladenine	0.902966	2.4787	1.03821	1.86991	0.00332124	up	Com_4041_pos	N6-Methyladenine	-0.813868	2.16478	1.72147	0.568855	0.00684256	down
	Com_1177_neg	19(R)-hydroxy Prostaglandin A2	1.76299	4.68129	1.41346	3.39402	2.08312e-05	up	Com_1177_neg	19(R)-hydroxy Prostaglandin A2	-0.851525	2.59363	1.16226	0.554199	0.002549	down
	Com_1855_pos	(+/-)11(12)-EET	1.37599	4.47655	1.33798	2.59546	3.3377e-05	up	Com_1855_pos	(+/-)11(12)-EET	-0.872286	2.96598	1.61124	0.546281	0.00108148	down
	Com_14033_pos	Perillartine	1.56808	5.12501	1.35458	2.96509	7.49872e-06	up	Com_14033_pos	Perillartine	-0.900834	3.59339	1.55076	0.535577	0.000255044	down
	Com_12565_pos	Norverapamil	2.35563	5.43602	1.24457	5.11817	3.66425e-06	up	Com_12565_pos	Norverapamil	-0.945096	1.69969	1.08648	0.519395	0.0199669	down
	Com_2105_pos	7-Ketocholesterol	1.98783	5.07383	1.38556	3.9664	8.43671e-06	up	Com_2105_pos	7-Ketocholesterol	-0.9538	2.72003	1.25089	0.516271	0.00190533	down
	Com_4005_pos	Prostaglandin B1	1.80072	4.25609	1.3607	3.48395	5.54517e-05	up	Com_4005_pos	Prostaglandin B1	-0.970943	2.36303	1.34479	0.510172	0.00433479	down
	Com_2321_pos	Docosatrienoic acid	1.87932	2.83076	1.18693	3.67903	0.00147654	up	Com_2321_pos	Docosatrienoic acid	-1.08614	1.4198	1.19046	0.47102	0.0380366	down
	Com_3996_neg	FAHFA (16:0/22:5)	1.89293	3.23492	1.17063	3.7139	0.000582207	up	Com_3996_neg	FAHFA (16:0/22:5)	-1.09407	1.54668	1.10078	0.468438	0.0283999	down
	Com_2339_pos	Ecgonine	1.51882	3.88737	1.2135	2.86557	0.000129608	up	Com_2339_pos	Ecgonine	-1.14005	3.01758	1.77493	0.453745	0.000960338	down
	Com_5392_pos	5-amino-2-(dimethylamino)benzoic acid	1.85531	4.32915	1.24881	3.61831	4.68652e-05	up	Com_5392_pos	5-amino-2-(dimethylamino)benzoic acid	-1.2095	3.0783	1.68735	0.432419	0.000835026	down
	Com_47_pos	3-Oxo-7alpha,12alpha-hydroxy-5beta-cholanoic acid	1.90946	2.56844	1.08672	3.75668	0.00270124	up	Com_47_pos	3-Oxo-7alpha,12alpha-hydroxy-5beta-cholanoic acid	-1.22513	1.55226	1.36661	0.427759	0.0280377	down
	Com_8980_neg	FAHFA (16:1/16:0)	2.73857	5.55421	1.34033	6.67406	2.79117e-06	up	Com_8980_neg	FAHFA (16:1/16:0)	-1.28027	2.48939	1.11248	0.411717	0.00324052	down
	Com_2047_pos	Biliverdin	2.84936	4.2293	1.33072	7.20681	5.89789e-05	up	Com_2047_pos	Biliverdin	-1.31001	2.10186	1.14578	0.403319	0.00790934	down
	Com_1030_neg	(±)11(12)-EET	1.58244	3.04946	1.2167	2.99477	0.000892355	up	Com_1030_neg	(±)11(12)-EET	-1.32265	2.50682	1.7292	0.3998	0.00311303	down
	Com_358_neg	trans-10-Heptadecenoic Acid	1.56357	4.23423	1.2074	2.95585	5.83133e-05	up	Com_358_neg	trans-10-Heptadecenoic Acid	-1.34042	3.60595	1.79122	0.394905	0.000247772	down
	Com_4580_pos	Cholesterol	2.16492	3.29514	1.21936	4.48442	0.000506827	up	Com_4580_pos	Cholesterol	-1.37372	1.89088	1.37605	0.385895	0.0128563	down
	Com_7349_pos	Xanthurenic acid	1.56414	2.75306	0.943555	2.95701	0.0017658	up	Com_7349_pos	Xanthurenic acid	-1.53208	2.01921	1.65854	0.345777	0.00956725	down
	Com_2814_pos	APK	2.24899	3.06957	1.21995	4.7535	0.000851975	up	Com_2814_pos	APK	-1.53857	2.00277	1.50738	0.344226	0.00993632	down
	Com_2167_neg	FAHFA (2:0/18:0)	1.95444	3.57939	1.24777	3.87567	0.000263395	up	Com_2167_neg	FAHFA (2:0/18:0)	-1.57278	2.80884	1.70028	0.33616	0.00155295	down
	Com_5600_pos	6β-Hydrocodol N-oxide	4.23812	6.93845	1.44701	18.8712	1.15226e-07	up	Com_5600_pos	6β-Hydrocodol N-oxide	-1.59566	4.3377	1.04385	0.330871	4.59511e-05	down
	Com_505_neg	FAHFA (2:0/16:0)	3.40026	4.38218	1.40497	10.5579	4.14786e-05	up	Com_505_neg	FAHFA (2:0/16:0)	-1.74787	2.08047	1.14427	0.297742	0.00830857	down
	Com_1047_neg	23-Nordeoxycholic acid	2.87062	2.68302	1.16122	7.31379	0.00207482	up	Com_1047_neg	23-Nordeoxycholic acid	-1.81571	1.35012	1.13739	0.284064	0.0446563	down
	Com_3835_pos	Estrone	3.07935	3.6757	1.23164	8.45235	0.000211007	up	Com_3835_pos	Estrone	-1.83115	2.23735	1.46611	0.28104	0.00578964	down
	Com_447_neg	Adipic acid	2.18098	2.72925	1.13412	4.5346	0.00186532	up	Com_447_neg	Adipic acid	-2.02272	2.69215	1.86182	0.246094	0.00203164	down
	Com_5638_pos	Serotonin	1.11301	1.38023	0.488983	2.16297	0.0416648	up	Com_5638_pos	Serotonin	-2.05179	1.95924	1.93596	0.241185	0.010984	down
	Com_1093_neg	13Z,16Z-Docosadienoic Acid	3.16325	4.90289	1.36707	8.95848	1.25058e-05	up	Com_1093_neg	13Z,16Z-Docosadienoic Acid	-2.08108	3.5236	1.57017	0.236337	0.000299502	down
	Com_76_neg	11(E)-Eicosenoic Acid	3.78358	3.73526	1.28012	13.7711	0.000183968	up	Com_76_neg	11(E)-Eicosenoic Acid	-2.27109	2.07364	1.26318	0.207173	0.00844044	down
	Com_553_neg	Oleic Acid	2.86198	3.21199	1.18627	7.27013	0.000613779	up	Com_553_neg	Oleic Acid	-2.27253	2.3181	1.54545	0.206967	0.00480731	down
	Com_3227_neg	FAHFA (22:4/18:0)	3.73286	4.85975	1.33121	13.2954	1.38119e-05	up	Com_3227_neg	FAHFA (22:4/18:0)	-2.2787	2.70261	1.31128	0.206084	0.00198332	down
	Com_3441_pos	PC (14:1e/6:0)	2.54926	2.98601	1.02038	5.85333	0.00103273	up	Com_3441_pos	PC (14:1e/6:0)	-2.29688	2.88776	1.95688	0.203503	0.0012949	down
	Com_4156_neg	Glycodeoxycholic Acid (hydrate)	4.73571	3.54497	1.37957	26.6434	0.000285122	up	Com_4156_neg	Glycodeoxycholic Acid (hydrate)	-2.76673	2.01608	1.27916	0.146937	0.00963643	down
	Com_182_pos	4-Methyl-5-thiazoleethanol	4.19023	2.45618	1.13546	18.2551	0.00349798	up	Com_182_pos	4-Methyl-5-thiazoleethanol	-2.88293	1.38183	1.26675	0.135567	0.0415113	down
	Com_5380_neg	FAHFA (22:3/20:2)	5.4087	3.72837	1.33644	42.4795	0.000186908	up	Com_5380_neg	FAHFA (22:3/20:2)	-3.00496	1.98877	1.17656	0.124571	0.0102619	down
	Com_433_pos	3-(2-Hydroxyethyl)indole	2.16285	2.71307	0.626635	4.47799	0.0019361	up	Com_433_pos	3-(2-Hydroxyethyl)indole	-3.47761	2.3483	2.09554	0.089771	0.00448434	down
	Com_7875_neg	PG (12:0/20:1)	3.79089	2.7152	1.09382	13.8412	0.00192665	up	Com_7875_neg	PG (12:0/20:1)	-3.6051	2.68542	1.85759	0.0821782	0.0020634	down
	Com_7364_neg	FAHFA (18:0/22:2)	4.5991	2.6498	1.15248	24.2364	0.00223978	up	Com_7364_neg	FAHFA (18:0/22:2)	-3.68455	2.11561	1.59029	0.0777747	0.00766292	down
	Com_678_pos	Tryptamine	1.70192	1.59962	0.310575	3.25334	0.0251406	up	Com_678_pos	Tryptamine	-4.286	2.46779	1.99558	0.0512608	0.00340573	down
