# Supplementary material for: Lacticaseibacillus rhamnosus P118 enhances host tolerance to Salmonella infection by promoting microbe-derived indole metabolites
Source: eLife. 2025 Aug 7;13:RP101198. doi: 10.7554/eLife.101198 (PMC12331243; doi:10.7554/eLife.101198)
Supplement: Supplementary file 11. [file elife-101198-supp11.xlsx]

## Sheet: Supplementary File 11
	Supplementary File 11 Prediction of aminotransferase class and tryptophan binding affinity in L. rhamnosus P118. Overview of aromatic amino acid aminotransferases (ArAT) in L. rhamnosus P118 broken apart by predicted PATRIC cross-genus global family ID. Inferred functional prediction was determined through enzyme commission (E.C.) designation, BLAST analysis of each locus using NCBI BlastP restri…
	Genome	Genome ID	Accession	PATRIC ID	Start	End	Length	Strand	PATRIC cross-genus families (PGfams)	AA Length	Product	Alternatively names
	Lacticaseibacillus rhamnosus P118	47715.1	CP099396	fig|47715.1217.peg.167	175026	176027	1002	+	PGF_06713057	333	D-lactate dehydrogenase (EC 1.1.1.28)	fldH (EC 1.1.1.28)
	Lacticaseibacillus rhamnosus P118	47715.1	CP099396	fig|47715.1217.peg.2176	2217580	2218572	993	-	PGF_06713057	330	D-lactate dehydrogenase (EC 1.1.1.28)	fldH (EC 1.1.1.28)
	Lacticaseibacillus rhamnosus P118	47715.1	CP099396	fig|47715.1217.peg.2177	2218621	2219784	1164	-	PGF_00064810	387	Aromatic amino acid aminotransferase gamma (EC 2.6.1.57) @ N-acetyl-L,L-diaminopimelate aminotransferase (EC 2.6.1.-)	AraT (EC 2.6.1.57)
	Lacticaseibacillus rhamnosus P118	47715.1	CP099396	fig|47715.1217.peg.814	826529	827701	1173	-	PGF_00064810	390	Aromatic amino acid aminotransferase gamma (EC 2.6.1.57) @ N-acetyl-L,L-diaminopimelate aminotransferase (EC 2.6.1.-)	AraT (EC 2.6.1.57)
	Lacticaseibacillus rhamnosus P118	47715.1	CP099396	fig|47715.1217.peg.1516	1510219	1511394	1176	-	PGF_04544396	391	Aspartate aminotransferase (EC 2.6.1.1)	ArAT (EC 2.6.1.1)
	Lacticaseibacillus rhamnosus P118	47715.1	CP099396	fig|47715.1217.peg.340	348273	349469	1197	-	PGF_04544396	398	Aspartate aminotransferase (EC 2.6.1.1)	ArAT (EC 2.6.1.1)
	Lacticaseibacillus rhamnosus P118	47715.1	CP099396	fig|47715.1217.peg.2639	2696398	2697600	1203	+	PGF_08861326	400	Aspartate aminotransferase (AspB-4) (EC 2.6.1.1)	AspB-4 (EC 2.6.1.1)
	Lacticaseibacillus rhamnosus P118	47715.1	CP099396	fig|47715.1217.peg.2901	2973229	2974011	783	-	PGF_00847718	260	Aliphatic amidase AmiE (EC 3.5.1.4)	AmiE (EC 3.5.1.4)
	Lacticaseibacillus rhamnosus P118	47715.1217	CP099396	fig|47715.1217.peg.97	101936	103156	1221	-	PGF_00062027	406	Tryptophan synthase beta chain (EC 4.2.1.20)	trpB (EC 4.2.1.20)
	Lacticaseibacillus rhamnosus P118	47715.1217	CP099396	fig|47715.1217.peg.96	101134	101943	810	-	PGF_00062023	269	Tryptophan synthase alpha chain (EC 4.2.1.20)	trpA (EC 4.2.1.20)
	Lacticaseibacillus rhamnosus P118	47715.1217	CP099396	fig|47715.1217.peg.2042	2070048	2071079	1032	+	PGF_08376928	343	Branched-chain amino acid aminotransferase (EC 2.6.1.42)	BCAT (EC 2.6.1.42)
	Lacticaseibacillus rhamnosus P118	47715.1	CP099396	fig|47715.1217.peg.99	103743	104522	780	-	PGF_00014051	259	Indole-3-glycerol phosphate synthase (EC 4.1.1.48)	IGPS (EC 4.1.1.48)
	Lacticaseibacillus rhamnosus P118	47715.1	CP099396	fig|47715.1217.peg.1725	1731725	1732462	738	-	PGF_00002970	245	FIG145533: Methyltransferase (EC 2.1.1.-)	MT (EC 2.1.1.-)
	Lacticaseibacillus rhamnosus P118	47715.1	CP099396	fig|47715.1217.peg.750	755502	758108	2607	+	PGF_09084129	868	Acetaldehyde dehydrogenase (EC 1.2.1.10) / Alcohol dehydrogenase (EC 1.1.1.1)	ALD (EC 1.2.1.10)
