# Supplementary material for: Lacticaseibacillus rhamnosus P118 enhances host tolerance to Salmonella infection by promoting microbe-derived indole metabolites
Source: eLife. 2025 Aug 7;13:RP101198. doi: 10.7554/eLife.101198 (PMC12331243; doi:10.7554/eLife.101198)
Supplement: Supplementary file 12. [file elife-101198-supp12.xlsx]

## Sheet: Supplementary File 12
	Supplementary File 12 Tryptophan metabolism and indole derivatives in L. rhamnosus P118 cultures
	Name	Other_name	Formula	Molecular Weight	RT [min]	Kegg_ID	KEGG_pathway	HMDB_ID	SuperClass(HMDB)	Class(HMDB)	SubClass(HMDB)	mzCloud_Results	mzVault_Results	MassList_Results	m/z	P118 (label-free quantitation intensity)	Log10 (P118 FLQ intensity)
	Indole-3-acrylic acid	3-Indoleacrylic acid (IA)	C11 H9 N O2	187.063	5.053	--	--	HMDB0000734	Organoheterocyclic compounds	Indoles and derivatives	Indoles	Full match	Full match	Full match	188.07	6.83156e+09	9.83452
	DL-Tryptophan	--	C11 H12 N2 O2	158.085	5.064	--	--	HMDB0030396	Organoheterocyclic compounds	Indoles and derivatives	Indolyl carboxylic acids and derivatives	Invalid mass	Invalid mass	No results	157.077	5.58991e+08	8.74741
	5-Hydroxyindole	--	C8 H7 N O	133.053	1.86	--	--	HMDB0059805	Organoheterocyclic compounds	Indoles and derivatives	Hydroxyindoles	Full match	Not the top hit	Full match	134.06	3.21312e+08	8.50693
	Indole	Indole; 2,3-Benzopyrrole	C8 H7 N	117.058	5.052	cpd:C00463	map00380 Tryptophan metabolism;map00400 Phenylalanine, tyrosine and tryptophan biosynthesis;map01100 Metabolic pathways;map01110 Biosynthesis of secondary metabolites	HMDB0000738	Organoheterocyclic compounds	Indoles and derivatives	Indoles	Full match	Full match	No results	118.065	3.10892e+08	8.49261
	Melatonin	Melatonin; N-Acetyl-5-methoxytryptamine	C13 H16 N2 O2	232.121	5.803	cpd:C01598	map00380 Tryptophan metabolism;map01100 Metabolic pathways	HMDB0001389	Organoheterocyclic compounds	Indoles and derivatives	Indoles	Full match	No results	Full match	233.128	2.73404e+08	8.4368
	6-Hydroxymelatonin	6-Hydroxymelatonin (6-OHM)	C13 H16 N2 O3	248.12	4.536	cpd:C05643	map00380 Tryptophan metabolism	HMDB0004081	Organoheterocyclic compounds	Indoles and derivatives	Hydroxyindoles	Invalid mass	No results	No results	249.127	1.67168e+08	8.22315
	5-Methoxyindoleacetic acid	5-Methoxyindoleacetate; 5-Methoxyindoleacetic acid; 5-methoxy-IAA; 5-MIAA	C11 H11 N O3	205.074	5.862	cpd:C05660	map00380 Tryptophan metabolism	HMDB0004096	Organoheterocyclic compounds	Indoles and derivatives	Indolyl carboxylic acids and derivatives	Full match	No results	Full match	206.081	1.11069e+08	8.04559
	Indole-3-lactic acid	Indolelactic acid (ILA)	C11 H11 N O3	205.074	5.607	--	--	HMDB0000671	Organoheterocyclic compounds	Indoles and derivatives	Indolyl carboxylic acids and derivatives	Full match	Full match	Full match	204.067	9.59625e+07	7.9821
	5-Hydroxytryptophan	5-Hydroxytryptophan; 5-HTP	C11 H12 N2 O3	220.088	2.209	cpd:C01017	--	HMDB0000472	Organoheterocyclic compounds	Indoles and derivatives	Tryptamines and derivatives	Invalid mass	No results	No results	219.081	9.19241e+07	7.96343
	N-Acetyl-D-tryptophan	N-Acetyl-D-tryptophan	C13 H14 N2 O3	246.1	5.256	cpd:C03137	--	HMDB0255052	Organic acids and derivatives	Carboxylic acids and derivatives	Amino acids, peptides, and analogues	No results	No results	Full match	247.108	5.01939e+07	7.70065
	Dl-Indole-3-lactic acid	--	C11 H11 N O3	205.074	6.042	--	--	--	--	--	--	No results	No results	Full match	206.081	4.43998e+07	7.64738
	L-Kynurenine	L-Kynurenine; 3-Anthraniloyl-L-alanine	C10 H12 N2 O3	208.085	5.535	cpd:C00328	map00380 Tryptophan metabolism;map01100 Metabolic pathways	HMDB0000684	Organic oxygen compounds	Organooxygen compounds	Carbonyl compounds	No results	No results	Full match	207.077	3.8053e+07	7.58039
	5-Hydroxytryptophol	5-HTOL	C10 H11 N O2	177.079	5.722	--	--	HMDB0001855	Organoheterocyclic compounds	Indoles and derivatives	Hydroxyindoles	No results	No results	Full match	176.072	3.65932e+07	7.5634
	Kynurenic acid	4-Hydroxy-2-quinolinecarboxylic acid; Kynurenic acid; Kynurenate; KYNA or KYN	C10 H7 N O3	189.043	5.587	cpd:C01717	map00380 Tryptophan metabolism;map01100 Metabolic pathways	HMDB0000715	Organoheterocyclic compounds	Quinolines and derivatives	Quinoline carboxylic acids	No results	No results	Full match	188.035	3.50486e+07	7.54467
